# Supplementary material for: The Effects of Policy Mixes on Urban Population Mobility: Evidence from Chinese Cities During the COVID-19 Pandemic
Source: Research Square preprint supplement (doi:10.21203/rs.3.rs-6885786/v1), 2025-12-10
Supplement: Supplementary file 1 [file 6c4c436541575e6ce67651f2.docx]

Appendix:

**Table of the classification of policy tools related to the COVID-19 pandemic**

| Policy categories | Dimensions | Connotation of index |
| --- | --- | --- |
| Service-oriented | Emergency prevention and control | Government departments provide emergency support and joint prevention and control |
| Party and government responsibilities | Hold political position, adhere to the leadership of the party and government, and fulfill responsibilities |
| Material support | Guarantee the supply of infection prevention supplies |
| Technical support | Provide testing equipment and expert guidance |
| Human resources | Protect the employment of enterprises and safeguard the rights and interests of workers |
| Service support | Medical security, legal consultation, traffic security, assistance, and online office |
| Information-oriented | Case publicity | Positive publicity for typical cases |
| Prevention guidelines | Strengthen prevention guidance and formulate a resumption plan |
| Information transmission | Strengthen publicity and publish relevant information |
| Economy-oriented | Consumption promotion | Issuing consumption coupons, opening night markets, etc. |
| Trade support | Provide proof of force majeure, booth fee subsidy |
| Government procurement | Increase government purchases |
| Financial support | Financial support through subsidies and tax relief |
| Financial support | Financial support for enterprises through insurance, guarantees, financing, loans, etc. |
| Regulation-oriented | Action control | Health declaration, use of health code, daily temperature measurement, disinfection, and mask code |
| Location control | Cancel gathering activities and relevant control policies for schools and public places |
| Traffic control | Road closure, notifications, and other regulatory measures |
| Medical isolation | Relevant instructions for troubleshooting and isolation of key personnel |
| Market supervision | Market supply guarantee, supervision, and law enforcement |
| Regulatory control | Supervision for non-cooperative actions |
